# Supplementary material for: Cardiac Troponin I and Incident Stroke in European Cohorts: Insights From the BiomarCaRE Project
Source: PubMed Central journal article supplement — Stroke. 2020 Aug 19;51(9):2770–7. doi: 10.1161/STROKEAHA.120.029452 (PMC7447179; doi:10.1161/strokeaha.120.029452), 2020-08-19
Supplement: str-51-2770-s002.pdf [file str-51-2770-s002.pdf]

## Change of Authorship Form

(Must be completed and signed by ALL authors)

Please check all that apply

New author(s) have been added (in addition to this form, all new authors must complete the copyright transfer agreement and conflict of interest disclosure.

Change in order of authorship.

An author wishes to remove his/her name. An author's name may only be removed his/her own request and a letter signed by the author should accompany this form

Manuscript Number STROKE/2020/029452

Manuscript Title Cardiac Troponin I and Incident Stroke in European Cohorts - Insights from the BiomarCaRE Project

### Former Authorship

Please list ALL AUTHORS in the same order as the original submission. For more than 12, use an extra sheet.

#### Print Name

Name (1) Stephan Camen  
Name (2) Tarja Palosaari  
Name (3) Ngoc Anh Sprünker  
Name (4) Teemu J. Niiranen  
Name (5) Francesco Gianfagna  
Name (6) Julie KK Vishram-Nielsen

#### Print Name

Name (7) Simona Costanzo  
Name (8) Stefan Söderberg  
Name (9) Luigi Palmieri  
Name (10) Marco M Ferrario  
Name (11) Annette Peters  
Name (12) Erkki Vartiainen

### New Authorship

All authors must sign below agreeing to the changes in authorship. The authorship order must reflect the authorship order of the manuscript.

|                                          |                                                                                                       |                        |
|------------------------------------------|-------------------------------------------------------------------------------------------------------|------------------------|
| Name (1) <u>Stephan Camen</u>            | Signature <u>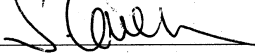</u> | Date <u>05/04/2020</u> |
| Name (2) <u>Tarja Palosaari</u>          | Signature _____                                                                                       | Date _____             |
| Name (3) <u>Jaakko Reinikainen</u>       | Signature _____                                                                                       | Date _____             |
| Name (4) <u>Ngoc Anh Sprünker</u>        | Signature _____                                                                                       | Date _____             |
| Name (5) <u>Teemu J. Niiranen</u>        | Signature _____                                                                                       | Date _____             |
| Name (6) <u>Francesco Gianfagna</u>      | Signature _____                                                                                       | Date _____             |
| Name (7) <u>Julie KK Vishram-Nielsen</u> | Signature _____                                                                                       | Date _____             |
| Name (8) <u>Simona Costanzo</u>          | Signature _____                                                                                       | Date _____             |
| Name (9) <u>Stefan Söderberg</u>         | Signature _____                                                                                       | Date _____             |
| Name (10) <u>Luigi Palmieri</u>          | Signature _____                                                                                       | Date _____             |
| Name (11) <u>Marco M Ferrario</u>        | Signature _____                                                                                       | Date _____             |
| Name (12) <u>Annette Peters</u>          | Signature _____                                                                                       | Date _____             |

Please scan and email to [stroke@strokeahajournal.org](mailto:stroke@strokeahajournal.org).

## Change of Authorship Form

---

(Must be completed and signed by ALL authors)

Please check all that apply

New author(s) have been added (in addition to this form, all new authors must complete the copyright transfer agreement and conflict of interest disclosure.

Change in order of authorship.

An author wishes to remove his/her name. An author's name may only be removed his/her own request and a letter signed by the author should accompany this form

Manuscript Number STROKE/2020/029452

Manuscript Title Cardiac Troponin I and Incident Stroke in European Cohorts - Insights from the BiomarCaRE Project

### Former Authorship

Please list ALL AUTHORS in the same order as the original submission. For more than 12, use an extra sheet.

#### Print Name

Name (1) Stephan Camen  
Name (2) Tarja Palosaari  
Name (3) Ngoc Anh Sprünker  
Name (4) Teemu J. Niiranen  
Name (5) Francesco Gianfagna  
Name (6) Julie KK Vishram-Nielsen

#### Print Name

Name (7) Simona Costanzo  
Name (8) Stefan Söderberg  
Name (9) Luigi Palmieri  
Name (10) Marco M Ferrario  
Name (11) Annette Peters  
Name (12) Erkki Vartiainen

### New Authorship

All authors must sign below agreeing to the changes in authorship. The authorship order must reflect the authorship order of the manuscript.

|                                          |                                  |                            |
|------------------------------------------|----------------------------------|----------------------------|
| Name (1) <u>Stephan Camen</u>            | Signature _____                  | Date _____                 |
| Name (2) <u>Tarja Palosaari</u>          | Signature <u>Tarja Palosaari</u> | Date <u>3rd April 2020</u> |
| Name (3) <u>Jaakko Reinikainen</u>       | Signature _____                  | Date _____                 |
| Name (4) <u>Ngoc Anh Sprünker</u>        | Signature _____                  | Date _____                 |
| Name (5) <u>Teemu J. Niiranen</u>        | Signature _____                  | Date _____                 |
| Name (6) <u>Francesco Gianfagna</u>      | Signature _____                  | Date _____                 |
| Name (7) <u>Julie KK Vishram-Nielsen</u> | Signature _____                  | Date _____                 |
| Name (8) <u>Simona Costanzo</u>          | Signature _____                  | Date _____                 |
| Name (9) <u>Stefan Söderberg</u>         | Signature _____                  | Date _____                 |
| Name (10) <u>Luigi Palmieri</u>          | Signature _____                  | Date _____                 |
| Name (11) <u>Marco M Ferrario</u>        | Signature _____                  | Date _____                 |
| Name (12) <u>Annette Peters</u>          | Signature _____                  | Date _____                 |

Please scan and email to [stroke@strokeahajournal.org](mailto:stroke@strokeahajournal.org).

## Change of Authorship Form

(Must be completed and signed by ALL authors)

Please check all that apply

New author(s) have been added (in addition to this form, all new authors must complete the copyright transfer agreement and conflict of interest disclosure.

Change in order of authorship.

An author wishes to remove his/her name. An author's name may only be removed his/her own request and a letter signed by the author should accompany this form

Manuscript Number STROKE/2020/029452

Manuscript Title Cardiac Troponin I and Incident Stroke in European Cohorts - Insights from the BiomarcARE Project

### Former Authorship

Please list ALL AUTHORS in the same order as the original submission. For more than 12, use an extra sheet.

#### Print Name

Name (1) Stephan Camen  
Name (2) Tarja Palosaari  
Name (3) Ngoc Anh Sprünker  
Name (4) Teemu J. Niiranen  
Name (5) Francesco Gianfagna  
Name (6) Julie KK Vishram-Nielsen

#### Print Name

Name (7) Simona Costanzo  
Name (8) Stefan Söderberg  
Name (9) Luigi Palmieri  
Name (10) Marco M Ferrario  
Name (11) Annette Peters  
Name (12) Erkki Vartiainen

### New Authorship

All authors must sign below agreeing to the changes in authorship. The authorship order must reflect the authorship order of the manuscript.

|                                          |                                                                                                |                              |
|------------------------------------------|------------------------------------------------------------------------------------------------|------------------------------|
| Name (1) <u>Stephan Camen</u>            | Signature _____                                                                                | Date _____                   |
| Name (2) <u>Tarja Palosaari</u>          | Signature _____                                                                                | Date _____                   |
| Name (3) <u>Jaakko Reinikainen</u>       | Signature 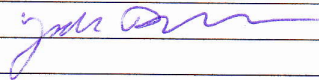 | Date <u>March 30th, 2020</u> |
| Name (4) <u>Ngoc Anh Sprünker</u>        | Signature _____                                                                                | Date _____                   |
| Name (5) <u>Teemu J. Niiranen</u>        | Signature _____                                                                                | Date _____                   |
| Name (6) <u>Francesco Gianfagna</u>      | Signature _____                                                                                | Date _____                   |
| Name (7) <u>Julie KK Vishram-Nielsen</u> | Signature _____                                                                                | Date _____                   |
| Name (8) <u>Simona Costanzo</u>          | Signature _____                                                                                | Date _____                   |
| Name (9) <u>Stefan Söderberg</u>         | Signature _____                                                                                | Date _____                   |
| Name (10) <u>Luigi Palmieri</u>          | Signature _____                                                                                | Date _____                   |
| Name (11) <u>Marco M Ferrario</u>        | Signature _____                                                                                | Date _____                   |
| Name (12) <u>Annette Peters</u>          | Signature _____                                                                                | Date _____                   |

Please scan and email to [stroke@strokeahajournal.org](mailto:stroke@strokeahajournal.org).

## Change of Authorship Form

(Must be completed and signed by ALL authors)

Please check all that apply

New author(s) have been added (in addition to this form, all new authors must complete the copyright transfer agreement and conflict of interest disclosure.

Change in order of authorship.

An author wishes to remove his/her name. An author's name may only be removed his/her own request and a letter signed by the author should accompany this form

Manuscript Number STROKE/2020/029452

Manuscript Title Cardiac Troponin I and Incident Stroke in European Cohorts - Insights from the BiomarcCaRE Project

### Former Authorship

Please list ALL AUTHORS in the same order as the original submission. For more than 12, use an extra sheet.

#### Print Name

Name (1) Stephan Camen  
Name (2) Tarja Palosaari  
Name (3) Ngoc Anh Sprünker  
Name (4) Teemu J. Niiranen  
Name (5) Francesco Gianfagna  
Name (6) Julie KK Vishram-Nielsen

#### Print Name

Name (7) Simona Costanzo  
Name (8) Stefan Söderberg  
Name (9) Luigi Palmieri  
Name (10) Marco M Ferrario  
Name (11) Annette Peters  
Name (12) Erkki Vartiainen

### New Authorship

All authors must sign below agreeing to the changes in authorship. The authorship order must reflect the authorship order of the manuscript.

|                                          |                              |                        |
|------------------------------------------|------------------------------|------------------------|
| Name (1) <u>Stephan Camen</u>            | Signature _____              | Date _____             |
| Name (2) <u>Tarja Palosaari</u>          | Signature _____              | Date _____             |
| Name (3) <u>Jaakko Reinikainen</u>       | Signature _____              | Date _____             |
| Name (4) <u>Ngoc Anh Sprünker</u>        | Signature <u>[Signature]</u> | Date <u>2020/04/22</u> |
| Name (5) <u>Teemu J. Niiranen</u>        | Signature _____              | Date _____             |
| Name (6) <u>Francesco Gianfagna</u>      | Signature _____              | Date _____             |
| Name (7) <u>Julie KK Vishram-Nielsen</u> | Signature _____              | Date _____             |
| Name (8) <u>Simona Costanzo</u>          | Signature _____              | Date _____             |
| Name (9) <u>Stefan Söderberg</u>         | Signature _____              | Date _____             |
| Name (10) <u>Luigi Palmieri</u>          | Signature _____              | Date _____             |
| Name (11) <u>Marco M Ferrario</u>        | Signature _____              | Date _____             |
| Name (12) <u>Annette Peters</u>          | Signature _____              | Date _____             |

Please scan and email to [stroke@strokeahajournal.org](mailto:stroke@strokeahajournal.org).



## Change of Authorship Form

---

(Must be completed and signed by ALL authors)

Please check all that apply

New author(s) have been added (in addition to this form, all new authors must complete the copyright transfer agreement and conflict of interest disclosure.

Change in order of authorship.

An author wishes to remove his/her name. An author's name may only be removed his/her own request and a letter signed by the author should accompany this form

Manuscript Number STROKE/2020/029452

Manuscript Title Cardiac Troponin I and Incident Stroke in European Cohorts - Insights from the BiomarCaRE Project

### Former Authorship

Please list ALL AUTHORS in the same order as the original submission. For more than 12, use an extra sheet.

#### Print Name

Name (1) Stephan Camen  
Name (2) Tarja Palosaari  
Name (3) Ngoc Anh Sprünker  
Name (4) Teemu J. Niiranen  
Name (5) Francesco Gianfagna  
Name (6) Julie KK Vishram-Nielsen

#### Print Name

Name (7) Simona Costanzo  
Name (8) Stefan Söderberg  
Name (9) Luigi Palmieri  
Name (10) Marco M Ferrario  
Name (11) Annette Peters  
Name (12) Erkki Vartiainen

### New Authorship

All authors must sign below agreeing to the changes in authorship. The authorship order must reflect the authorship order of the manuscript.

|                                          |                                                                                               |                       |
|------------------------------------------|-----------------------------------------------------------------------------------------------|-----------------------|
| Name (1) <u>Stephan Camen</u>            | Signature _____                                                                               | Date _____            |
| Name (2) <u>Tarja Palosaari</u>          | Signature _____                                                                               | Date _____            |
| Name (3) <u>Jaakko Reinikainen</u>       | Signature _____                                                                               | Date _____            |
| Name (4) <u>Ngoc Anh Sprünker</u>        | Signature _____                                                                               | Date _____            |
| Name (5) <u>Teemu J. Niiranen</u>        | Signature  | Date <u>30.3.2020</u> |
| Name (6) <u>Francesco Gianfagna</u>      | Signature _____                                                                               | Date _____            |
| Name (7) <u>Julie KK Vishram-Nielsen</u> | Signature _____                                                                               | Date _____            |
| Name (8) <u>Simona Costanzo</u>          | Signature _____                                                                               | Date _____            |
| Name (9) <u>Stefan Söderberg</u>         | Signature _____                                                                               | Date _____            |
| Name (10) <u>Luigi Palmieri</u>          | Signature _____                                                                               | Date _____            |
| Name (11) <u>Marco M Ferrario</u>        | Signature _____                                                                               | Date _____            |
| Name (12) <u>Annette Peters</u>          | Signature _____                                                                               | Date _____            |

Please scan and email to [stroke@strokeahajournal.org](mailto:stroke@strokeahajournal.org).

## Change of Authorship Form

---

(Must be completed and signed by ALL authors)

Please check all that apply

New author(s) have been added (in addition to this form, all new authors must complete the copyright transfer agreement and conflict of interest disclosure.

Change in order of authorship.

An author wishes to remove his/her name. An author's name may only be removed his/her own request and a letter signed by the author should accompany this form

Manuscript Number STROKE/2020/029452

Manuscript Title Cardiac Troponin I and Incident Stroke in European Cohorts - Insights from the BiomarCaRE Project

### Former Authorship

Please list ALL AUTHORS in the same order as the original submission. For more than 12, use an extra sheet.

#### Print Name

Name (1) Stephan Camen  
Name (2) Tarja Palosaari  
Name (3) Ngoc Anh Sprünker  
Name (4) Teemu J. Niiranen  
Name (5) Francesco Gianfagna  
Name (6) Julie KK Vishram-Nielsen

#### Print Name

Name (7) Simona Costanzo  
Name (8) Stefan Söderberg  
Name (9) Luigi Palmieri  
Name (10) Marco M Ferrario  
Name (11) Annette Peters  
Name (12) Erkki Vartiainen

### New Authorship

All authors must sign below agreeing to the changes in authorship. The authorship order must reflect the authorship order of the manuscript.

|                                          |                                                                                                       |                        |
|------------------------------------------|-------------------------------------------------------------------------------------------------------|------------------------|
| Name (1) <u>Stephan Camen</u>            | Signature _____                                                                                       | Date _____             |
| Name (2) <u>Tarja Palosaari</u>          | Signature _____                                                                                       | Date _____             |
| Name (3) <u>Jaakko Reinikainen</u>       | Signature _____                                                                                       | Date _____             |
| Name (4) <u>Ngoc Anh Sprünker</u>        | Signature _____                                                                                       | Date _____             |
| Name (5) <u>Teemu J. Niiranen</u>        | Signature _____                                                                                       | Date _____             |
| Name (6) <u>Francesco Gianfagna</u>      | Signature <u></u> | Date <u>23/04/2020</u> |
| Name (7) <u>Julie KK Vishram-Nielsen</u> | Signature _____                                                                                       | Date _____             |
| Name (8) <u>Simona Costanzo</u>          | Signature _____                                                                                       | Date _____             |
| Name (9) <u>Stefan Söderberg</u>         | Signature _____                                                                                       | Date _____             |
| Name (10) <u>Luigi Palmieri</u>          | Signature _____                                                                                       | Date _____             |
| Name (11) <u>Marco M Ferrario</u>        | Signature _____                                                                                       | Date _____             |
| Name (12) <u>Annette Peters</u>          | Signature _____                                                                                       | Date _____             |

Please scan and email to [stroke@strokeahajournal.org](mailto:stroke@strokeahajournal.org).

## Change of Authorship Form

---

(Must be completed and signed by ALL authors)

Please check all that apply

New author(s) have been added (in addition to this form, all new authors must complete the copyright transfer agreement and conflict of interest disclosure.

Change in order of authorship.

An author wishes to remove his/her name. An author's name may only be removed his/her own request and a letter signed by the author should accompany this form

Manuscript Number STROKE/2020/029452

Manuscript Title Cardiac Troponin I and Incident Stroke in European Cohorts - Insights from the BiomarCaRE Project

### Former Authorship

Please list ALL AUTHORS in the same order as the original submission. For more than 12, use an extra sheet.

#### Print Name

Name (1) Stephan Camen  
Name (2) Tarja Palosaari  
Name (3) Ngoc Anh Sprünker  
Name (4) Teemu J. Niiranen  
Name (5) Francesco Gianfagna  
Name (6) Julie KK Vishram-Nielsen

#### Print Name

Name (7) Simona Costanzo  
Name (8) Stefan Söderberg  
Name (9) Luigi Palmieri  
Name (10) Marco M Ferrario  
Name (11) Annette Peters  
Name (12) Erkki Vartiainen

### New Authorship

All authors must sign below agreeing to the changes in authorship. The authorship order must reflect the authorship order of the manuscript.

|                                          |                                           |                       |
|------------------------------------------|-------------------------------------------|-----------------------|
| Name (1) <u>Stephan Camen</u>            | Signature _____                           | Date _____            |
| Name (2) <u>Tarja Palosaari</u>          | Signature _____                           | Date _____            |
| Name (3) <u>Jaakko Reinikainen</u>       | Signature _____                           | Date _____            |
| Name (4) <u>Ngoc Anh Sprünker</u>        | Signature _____                           | Date _____            |
| Name (5) <u>Teemu J. Niiranen</u>        | Signature _____                           | Date _____            |
| Name (6) <u>Francesco Gianfagna</u>      | Signature _____                           | Date _____            |
| Name (7) <u>Julie KK Vishram-Nielsen</u> | Signature <u>Julie KK Vishram-Nielsen</u> | Date <u>30/3/2020</u> |
| Name (8) <u>Simona Costanzo</u>          | Signature _____                           | Date _____            |
| Name (9) <u>Stefan Söderberg</u>         | Signature _____                           | Date _____            |
| Name (10) <u>Luigi Palmieri</u>          | Signature _____                           | Date _____            |
| Name (11) <u>Marco M Ferrario</u>        | Signature _____                           | Date _____            |
| Name (12) <u>Annette Peters</u>          | Signature _____                           | Date _____            |

Please scan and email to [stroke@strokeahajournal.org](mailto:stroke@strokeahajournal.org).

## Change of Authorship Form

(Must be completed and signed by ALL authors)

Please check all that apply

New author(s) have been added (in addition to this form, all new authors must complete the copyright transfer agreement and conflict of interest disclosure.

Change in order of authorship.

An author wishes to remove his/her name. An author's name may only be removed his/her own request and a letter signed by the author should accompany this form

Manuscript Number STROKE/2020/029452

Manuscript Title Cardiac Troponin I and Incident Stroke in European Cohorts - Insights from the BiomarCaRE Project

### Former Authorship

Please list ALL AUTHORS in the same order as the original submission. For more than 12, use an extra sheet.

#### Print Name

|          |                                 |
|----------|---------------------------------|
| Name (1) | <u>Stephan Camen</u>            |
| Name (2) | <u>Tarja Palosaari</u>          |
| Name (3) | <u>Ngoc Anh Sprünker</u>        |
| Name (4) | <u>Teemu J. Niiranen</u>        |
| Name (5) | <u>Francesco Gianfagna</u>      |
| Name (6) | <u>Julie KK Vishram-Nielsen</u> |

#### Print Name

|           |                         |
|-----------|-------------------------|
| Name (7)  | <u>Simona Costanzo</u>  |
| Name (8)  | <u>Stefan Söderberg</u> |
| Name (9)  | <u>Luigi Palmieri</u>   |
| Name (10) | <u>Marco M Ferrario</u> |
| Name (11) | <u>Annette Peters</u>   |
| Name (12) | <u>Erkki Vartiainen</u> |

### New Authorship

All authors must sign below agreeing to the changes in authorship. The authorship order must reflect the authorship order of the manuscript.

|           |                                 |                                  |                        |
|-----------|---------------------------------|----------------------------------|------------------------|
| Name (1)  | <u>Stephan Camen</u>            | Signature _____                  | Date _____             |
| Name (2)  | <u>Tarja Palosaari</u>          | Signature _____                  | Date _____             |
| Name (3)  | <u>Jaakko Reinikainen</u>       | Signature _____                  | Date _____             |
| Name (4)  | <u>Ngoc Anh Sprünker</u>        | Signature _____                  | Date _____             |
| Name (5)  | <u>Teemu J. Niiranen</u>        | Signature _____                  | Date _____             |
| Name (6)  | <u>Francesco Gianfagna</u>      | Signature _____                  | Date _____             |
| Name (7)  | <u>Julie KK Vishram-Nielsen</u> | Signature _____                  | Date _____             |
| Name (8)  | <u>Simona Costanzo</u>          | Signature <u>Simona Costanzo</u> | Date <u>30/03/2020</u> |
| Name (9)  | <u>Stefan Söderberg</u>         | Signature _____                  | Date _____             |
| Name (10) | <u>Luigi Palmieri</u>           | Signature _____                  | Date _____             |
| Name (11) | <u>Marco M Ferrario</u>         | Signature _____                  | Date _____             |
| Name (12) | <u>Annette Peters</u>           | Signature _____                  | Date _____             |

Please scan and email to [stroke@strokeahajournal.org](mailto:stroke@strokeahajournal.org).

## Change of Authorship Form

(Must be completed and signed by ALL authors)

Please check all that apply

New author(s) have been added (in addition to this form, all new authors must complete the copyright transfer agreement and conflict of interest disclosure.

Change in order of authorship.

An author wishes to remove his/her name. An author's name may only be removed his/her own request and a letter signed by the author should accompany this form

Manuscript Number STROKE/2020/029452

Manuscript Title Cardiac Troponin I and Incident Stroke in European Cohorts - Insights from the BiomarCaRE Project

### Former Authorship

Please list ALL AUTHORS in the same order as the original submission. For more than 12, use an extra sheet.

#### Print Name

Name (1) Stephan Camen  
Name (2) Tarja Palosaari  
Name (3) Ngoc Anh Sprünker  
Name (4) Teemu J. Niiranen  
Name (5) Francesco Gianfagna  
Name (6) Julie KK Vishram-Nielsen

#### Print Name

Name (7) Simona Costanzo  
Name (8) Stefan Söderberg  
Name (9) Luigi Palmieri  
Name (10) Marco M Ferrario  
Name (11) Annette Peters  
Name (12) Erkki Vartiainen

### New Authorship

All authors must sign below agreeing to the changes in authorship. The authorship order must reflect the authorship order of the manuscript.

|                                          |                                                                                                |                       |
|------------------------------------------|------------------------------------------------------------------------------------------------|-----------------------|
| Name (1) <u>Stephan Camen</u>            | Signature _____                                                                                | Date _____            |
| Name (2) <u>Tarja Palosaari</u>          | Signature _____                                                                                | Date _____            |
| Name (3) <u>Jaakko Reinikainen</u>       | Signature _____                                                                                | Date _____            |
| Name (4) <u>Ngoc Anh Sprünker</u>        | Signature _____                                                                                | Date _____            |
| Name (5) <u>Teemu J. Niiranen</u>        | Signature _____                                                                                | Date _____            |
| Name (6) <u>Francesco Gianfagna</u>      | Signature _____                                                                                | Date _____            |
| Name (7) <u>Julie KK Vishram-Nielsen</u> | Signature _____                                                                                | Date _____            |
| Name (8) <u>Simona Costanzo</u>          | Signature _____                                                                                | Date _____            |
| Name (9) <u>Stefan Söderberg</u>         | Signature 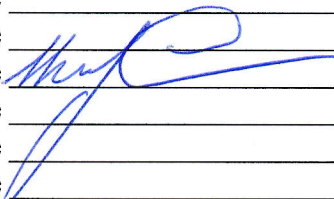 | Date <u>29/3 2020</u> |
| Name (10) <u>Luigi Palmieri</u>          | Signature _____                                                                                | Date _____            |
| Name (11) <u>Marco M Ferrario</u>        | Signature _____                                                                                | Date _____            |
| Name (12) <u>Annette Peters</u>          | Signature _____                                                                                | Date _____            |

Please scan and email to [stroke@strokeahajournal.org](mailto:stroke@strokeahajournal.org).



# Change of Authorship Form

(Must be completed and signed by ALL authors)

Please check all that apply

New author(s) have been added (in addition to this form, all new authors must complete the copyright transfer agreement and conflict of interest disclosure.

Change in order of authorship.

An author wishes to remove his/her name. An author's name may only be removed his/her own request and a letter signed by the author should accompany this form

Manuscript Number STROKE/2020/029452

Manuscript Title Cardiac Troponin I and Incident Stroke in European Cohorts - Insights from the BiomarCaRE Project

## Former Authorship

Please list ALL AUTHORS in the same order as the original submission. For more than 12, use an extra sheet.

### Print Name

Name (1) Stephan Camen  
Name (2) Tarja Palosaari  
Name (3) Ngoc Anh Sprünker  
Name (4) Teemu J. Niiranen  
Name (5) Francesco Gianfagna  
Name (6) Julie KK Vishram-Nielsen

### Print Name

Name (7) Simona Costanzo  
Name (8) Stefan Söderberg  
Name (9) Luigi Palmieri  
Name (10) Marco M Ferrario  
Name (11) Annette Peters  
Name (12) Erkki Vartiainen

## New Authorship

All authors must sign below agreeing to the changes in authorship. The authorship order must reflect the authorship order of the manuscript.

|                                          |                                                                                                |                        |
|------------------------------------------|------------------------------------------------------------------------------------------------|------------------------|
| Name (1) <u>Stephan Camen</u>            | Signature _____                                                                                | Date _____             |
| Name (2) <u>Tarja Palosaari</u>          | Signature _____                                                                                | Date _____             |
| Name (3) <u>Jaakko Reinikainen</u>       | Signature _____                                                                                | Date _____             |
| Name (4) <u>Ngoc Anh Sprünker</u>        | Signature _____                                                                                | Date _____             |
| Name (5) <u>Teemu J. Niiranen</u>        | Signature _____                                                                                | Date _____             |
| Name (6) <u>Francesco Gianfagna</u>      | Signature _____                                                                                | Date _____             |
| Name (7) <u>Julie KK Vishram-Nielsen</u> | Signature _____                                                                                | Date _____             |
| Name (8) <u>Simona Costanzo</u>          | Signature _____                                                                                | Date _____             |
| Name (9) <u>Stefan Söderberg</u>         | Signature _____                                                                                | Date _____             |
| Name (10) <u>Luigi Palmieri</u>          | Signature _____                                                                                | Date _____             |
| Name (11) <u>Marco M Ferrario</u>        | Signature 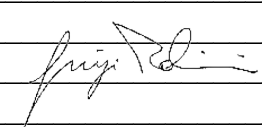 | Date <u>30/03/2020</u> |
| Name (12) <u>Annette Peters</u>          | Signature _____                                                                                | Date _____             |

Please scan and email to [stroke@strokeahajournal.org](mailto:stroke@strokeahajournal.org).

## Change of Authorship Form

(Must be completed and signed by ALL authors)

Please check all that apply

New author(s) have been added (in addition to this form, all new authors must complete the copyright transfer agreement and conflict of interest disclosure.

Change in order of authorship.

\_\_\_\_\_ An author wishes to remove his/her name. An author's name may only be removed his/her own request and a letter signed by the author should accompany this form

Manuscript Number STROKE/2020/029452

Manuscript Title Cardiac Troponin I and Incident Stroke in European Cohorts - Insights from the BiomarcARE Project

### Former Authorship

Please list ALL AUTHORS in the same order as the original submission. For more than 12, use an extra sheet.

#### Print Name

Name (1) Stephan Camen  
Name (2) Tarja Palosaari  
Name (3) Ngoc Anh Sprünker  
Name (4) Teemu J. Niiranen  
Name (5) Francesco Gianfagna  
Name (6) Julie KK Vishram-Nielsen

#### Print Name

Name (7) Simona Costanzo  
Name (8) Stefan Söderberg  
Name (9) Luigi Palmieri  
Name (10) Marco M Ferrario  
Name (11) Annette Peters  
Name (12) Erkki Vartiainen

### New Authorship

All authors must sign below agreeing to the changes in authorship. The authorship order must reflect the authorship order of the manuscript.

|                                          |                                                                                                |                        |
|------------------------------------------|------------------------------------------------------------------------------------------------|------------------------|
| Name (1) <u>Stephan Camen</u>            | Signature _____                                                                                | Date _____             |
| Name (2) <u>Tarja Palosaari</u>          | Signature _____                                                                                | Date _____             |
| Name (3) <u>Jaakko Reinikainen</u>       | Signature _____                                                                                | Date _____             |
| Name (4) <u>Ngoc Anh Sprünker</u>        | Signature _____                                                                                | Date _____             |
| Name (5) <u>Teemu J. Niiranen</u>        | Signature _____                                                                                | Date _____             |
| Name (6) <u>Francesco Gianfagna</u>      | Signature _____                                                                                | Date _____             |
| Name (7) <u>Julie KK Vishram-Nielsen</u> | Signature _____                                                                                | Date _____             |
| Name (8) <u>Simona Costanzo</u>          | Signature _____                                                                                | Date _____             |
| Name (9) <u>Stefan Söderberg</u>         | Signature _____                                                                                | Date _____             |
| Name (10) <u>Luigi Palmieri</u>          | Signature _____                                                                                | Date _____             |
| Name (11) <u>Marco M Ferrario</u>        | Signature 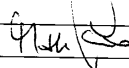 | Date <u>23/06/2020</u> |
| Name (12) <u>Annette Peters</u>          | Signature _____                                                                                | Date _____             |

Please scan and email to [stroke@strokeahjournal.org](mailto:stroke@strokeahjournal.org).

# Change of Authorship Form

---

**(Must be completed and signed by ALL authors)**

Please check all that apply

\_\_\_\_\_ New author(s) have been added (in addition to this form, all new authors must complete the copyright transfer agreement and conflict of interest disclosure.

\_\_\_\_\_ Change in order of authorship.

\_\_\_\_\_ An author wishes to remove his/her name. An author's name may only be removed his/her own request and a letter signed by the author should accompany this form

**Manuscript Number** \_\_\_\_\_

**Manuscript Title** \_\_\_\_\_

## Former Authorship

Please list ALL AUTHORS in the same order as the original submission. For more than 12, use an extra sheet.

### Print Name

Name (1) \_\_\_\_\_  
Name (2) \_\_\_\_\_  
Name (3) \_\_\_\_\_  
Name (4) \_\_\_\_\_  
Name (5) \_\_\_\_\_  
Name (6) \_\_\_\_\_

### Print Name

Name (7) \_\_\_\_\_  
Name (8) \_\_\_\_\_  
Name (9) \_\_\_\_\_  
Name (10) \_\_\_\_\_  
Name (11) \_\_\_\_\_  
Name (12) \_\_\_\_\_

## New Authorship

All authors must sign below agreeing to the changes in authorship. The authorship order must reflect the authorship order of the manuscript.

|                 |                                                                                                |            |
|-----------------|------------------------------------------------------------------------------------------------|------------|
| Name (1) _____  | Signature _____                                                                                | Date _____ |
| Name (2) _____  | Signature _____                                                                                | Date _____ |
| Name (3) _____  | Signature _____                                                                                | Date _____ |
| Name (4) _____  | Signature _____                                                                                | Date _____ |
| Name (5) _____  | Signature _____                                                                                | Date _____ |
| Name (6) _____  | Signature _____                                                                                | Date _____ |
| Name (7) _____  | Signature _____                                                                                | Date _____ |
| Name (8) _____  | Signature _____                                                                                | Date _____ |
| Name (9) _____  | Signature _____                                                                                | Date _____ |
| Name (10) _____ | Signature _____                                                                                | Date _____ |
| Name (11) _____ | Signature _____                                                                                | Date _____ |
| Name (12) _____ | Signature  | Date _____ |

**Please scan and email to [stroke@strokeahajournal.org](mailto:stroke@strokeahajournal.org).**

## Change of Authorship Form – Continued

**Manuscript Number:** STROKE/2020/029452

**Manuscript Title:** Cardiac Troponin I and Incident Stroke in European Cohorts - Insights from the BiomarCaRE Project

### Former Authorship

|                                      |                                |
|--------------------------------------|--------------------------------|
| Name (13): Maria Benedetta Donati    | Name (23): Giovanni de Gaetano |
| Name (14): Chiara Donfrancesco       | Name (24): Hugh Tunstall-Pedoe |
| Name (15): Rossana Borchini          | Name (25): Susanne Rospleszcz  |
| Name (16): Christin Susanna Börschel | Name (26): Torben Jørgensen    |
| Name (17): Simona Giampaoli          | Name (27): Tanja Zeller        |
| Name (18): Augusto Di Castelnuovo    | Name (28): Kari Kuulasmaa      |
| Name (19): Christina Magnussen       | Name (29): Allan Linneberg     |
| Name (20): Frank Kee                 | Name (30): Veikko Salomaa      |
| Name (21): Wolfgang Koenig           | Name (31): Licia Iacoviello    |
| Name (22): Stefan Blankenberg        | Name (32): Renate Schnabel     |

### New Authorship

|                                      |                                                                                                |                |
|--------------------------------------|------------------------------------------------------------------------------------------------|----------------|
| Name (13): Erkki Vartiainen          | Signature:  | Date: 7.1.2020 |
| Name (14): Maria Benedetta Donati    | Signature:                                                                                     | Date:          |
| Name (15): Chiara Donfrancesco       | Signature:                                                                                     | Date:          |
| Name (16): Rossana Borchini          | Signature:                                                                                     | Date:          |
| Name (17): Christin Susanna Börschel | Signature:                                                                                     | Date:          |
| Name (18): Simona Giampaoli          | Signature:                                                                                     | Date:          |
| Name (19): Augusto Di Castelnuovo    | Signature:                                                                                     | Date:          |
| Name (20): Christina Magnussen       | Signature:                                                                                     | Date:          |
| Name (21): Frank Kee                 | Signature:                                                                                     | Date:          |
| Name (22): Wolfgang Koenig           | Signature:                                                                                     | Date:          |
| Name (23): Stefan Blankenberg        | Signature:                                                                                     | Date:          |
| Name (24): Giovanni de Gaetano       | Signature:                                                                                     | Date:          |
| Name (25): Hugh Tunstall-Pedoe       | Signature:                                                                                     | Date:          |
| Name (26): Susanne Rospleszcz        | Signature:                                                                                     | Date:          |
| Name (27): Torben Jørgensen          | Signature:                                                                                     | Date:          |
| Name (28): Tanja Zeller              | Signature:                                                                                     | Date:          |
| Name (29): Kari Kuulasmaa            | Signature:                                                                                     | Date:          |
| Name (30): Allan Linneberg           | Signature:                                                                                     | Date:          |
| Name (31): Veikko Salomaa            | Signature:                                                                                     | Date:          |
| Name (32): Licia Iacoviello          | Signature:                                                                                     | Date:          |
| Name (33): Renate Schnabel           | Signature:                                                                                     | Date:          |

## Change of Authorship Form – Continued

Manuscript Number: STROKE/2020/029452

Manuscript Title: Cardiac Troponin I and Incident Stroke in European Cohorts - Insights from the BiomarcCaRE Project

### Former Authorship

|                                      |                                |
|--------------------------------------|--------------------------------|
| Name (13): Maria Benedetta Donati    | Name (23): Giovanni de Gaetano |
| Name (14): Chiara Donfrancesco       | Name (24): Hugh Tunstall-Pedoe |
| Name (15): Rossana Borchini          | Name (25): Susanne Rospleszcz  |
| Name (16): Christin Susanna Börschel | Name (26): Torben Jørgensen    |
| Name (17): Simona Giampaoli          | Name (27): Tanja Zeller        |
| Name (18): Augusto Di Castelnuovo    | Name (28): Kari Kuulasmaa      |
| Name (19): Christina Magnussen       | Name (29): Allan Linneberg     |
| Name (20): Frank Kee                 | Name (30): Veikko Salomaa      |
| Name (21): Wolfgang Koenig           | Name (31): Licia Iacoviello    |
| Name (22): Stefan Blankenberg        | Name (32): Renate Schnabel     |

### New Authorship

|                                      |                                                                                                 |                  |
|--------------------------------------|-------------------------------------------------------------------------------------------------|------------------|
| Name (13): Erkki Vartiainen          | Signature:                                                                                      | Date:            |
| Name (14): Maria Benedetta Donati    | Signature: 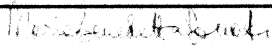 | Date: 30.03.2020 |
| Name (15): Chiara Donfrancesco       | Signature:                                                                                      | Date:            |
| Name (16): Rossana Borchini          | Signature:                                                                                      | Date:            |
| Name (17): Christin Susanna Börschel | Signature:                                                                                      | Date:            |
| Name (18): Simona Giampaoli          | Signature:                                                                                      | Date:            |
| Name (19): Augusto Di Castelnuovo    | Signature:                                                                                      | Date:            |
| Name (20): Christina Magnussen       | Signature:                                                                                      | Date:            |
| Name (21): Frank Kee                 | Signature:                                                                                      | Date:            |
| Name (22): Wolfgang Koenig           | Signature:                                                                                      | Date:            |
| Name (23): Stefan Blankenberg        | Signature:                                                                                      | Date:            |
| Name (24): Giovanni de Gaetano       | Signature:  | Date: 30.03.2020 |
| Name (25): Hugh Tunstall-Pedoe       | Signature:                                                                                      | Date:            |
| Name (26): Susanne Rospleszcz        | Signature:                                                                                      | Date:            |
| Name (27): Torben Jørgensen          | Signature:                                                                                      | Date:            |
| Name (28): Tanja Zeller              | Signature:                                                                                      | Date:            |
| Name (29): Kari Kuulasmaa            | Signature:                                                                                      | Date:            |
| Name (30): Allan Linneberg           | Signature:                                                                                      | Date:            |
| Name (31): Veikko Salomaa            | Signature:                                                                                      | Date:            |
| Name (32): Licia Iacoviello          | Signature:  | Date: 30.03.2020 |
| Name (33): Renate Schnabel           | Signature:                                                                                      | Date:            |



## Change of Authorship Form – Continued

Manuscript Number: STROKE/2020/029452

Manuscript Title: Cardiac Troponin I and Incident Stroke in European Cohorts - Insights from the BiomarCaRE Project

### Former Authorship

|                                      |                                |
|--------------------------------------|--------------------------------|
| Name (13): Maria Benedetta Donati    | Name (23): Giovanni de Gaetano |
| Name (14): Chiara Donfrancesco       | Name (24): Hugh Tunstall-Pedoe |
| Name (15): Rossana Borchini          | Name (25): Susanne Rospleszcz  |
| Name (16): Christin Susanna Börschel | Name (26): Torben Jørgensen    |
| Name (17): Simona Giampaoli          | Name (27): Tanja Zeller        |
| Name (18): Augusto Di Castelnuovo    | Name (28): Kari Kuulasmaa      |
| Name (19): Christina Magnussen       | Name (29): Allan Linneberg     |
| Name (20): Frank Kee                 | Name (30): Veikko Salomaa      |
| Name (21): Wolfgang Koenig           | Name (31): Licia Iacoviello    |
| Name (22): Stefan Blankenberg        | Name (32): Renate Schnabel     |

### New Authorship

|                                      |                                                                                                 |                  |
|--------------------------------------|-------------------------------------------------------------------------------------------------|------------------|
| Name (13): Erkki Vartiainen          | Signature:                                                                                      | Date:            |
| Name (14): Maria Benedetta Donati    | Signature:                                                                                      | Date:            |
| Name (15): Chiara Donfrancesco       | Signature: 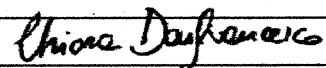 | Date: 03/30/2020 |
| Name (16): Rossana Borchini          | Signature:                                                                                      | Date:            |
| Name (17): Christin Susanna Börschel | Signature:                                                                                      | Date:            |
| Name (18): Simona Giampaoli          | Signature:                                                                                      | Date:            |
| Name (19): Augusto Di Castelnuovo    | Signature:                                                                                      | Date:            |
| Name (20): Christina Magnussen       | Signature:                                                                                      | Date:            |
| Name (21): Frank Kee                 | Signature:                                                                                      | Date:            |
| Name (22): Wolfgang Koenig           | Signature:                                                                                      | Date:            |
| Name (23): Stefan Blankenberg        | Signature:                                                                                      | Date:            |
| Name (24): Giovanni de Gaetano       | Signature:                                                                                      | Date:            |
| Name (25): Hugh Tunstall-Pedoe       | Signature:                                                                                      | Date:            |
| Name (26): Susanne Rospleszcz        | Signature:                                                                                      | Date:            |
| Name (27): Torben Jørgensen          | Signature:                                                                                      | Date:            |
| Name (28): Tanja Zeller              | Signature:                                                                                      | Date:            |
| Name (29): Kari Kuulasmaa            | Signature:                                                                                      | Date:            |
| Name (30): Allan Linneberg           | Signature:                                                                                      | Date:            |
| Name (31): Veikko Salomaa            | Signature:                                                                                      | Date:            |
| Name (32): Licia Iacoviello          | Signature:                                                                                      | Date:            |
| Name (33): Renate Schnabel           | Signature:                                                                                      | Date:            |

## Change of Authorship Form – Continued

**Manuscript Number:** STROKE/2020/029452

**Manuscript Title:** Cardiac Troponin I and Incident Stroke in European Cohorts - Insights from the BiomarCaRE Project

### Former Authorship

|                                      |                                |
|--------------------------------------|--------------------------------|
| Name (13): Maria Benedetta Donati    | Name (23): Giovanni de Gaetano |
| Name (14): Chiara Donfrancesco       | Name (24): Hugh Tunstall-Pedoe |
| Name (15): Rossana Borchini          | Name (25): Susanne Rospleszcz  |
| Name (16): Christin Susanna Börschel | Name (26): Torben Jørgensen    |
| Name (17): Simona Giampaoli          | Name (27): Tanja Zeller        |
| Name (18): Augusto Di Castelnuovo    | Name (28): Kari Kuulasmaa      |
| Name (19): Christina Magnussen       | Name (29): Allan Linneberg     |
| Name (20): Frank Kee                 | Name (30): Veikko Salomaa      |
| Name (21): Wolfgang Koenig           | Name (31): Licia Iacoviello    |
| Name (22): Stefan Blankenberg        | Name (32): Renate Schnabel     |

### New Authorship

|                                      |                                                                                                 |               |
|--------------------------------------|-------------------------------------------------------------------------------------------------|---------------|
| Name (13): Erkki Vartiainen          | Signature:                                                                                      | Date:         |
| Name (14): Maria Benedetta Donati    | Signature:                                                                                      | Date:         |
| Name (15): Chiara Donfrancesco       | Signature:                                                                                      | Date:         |
| Name (16): Rossana Borchini          | Signature: 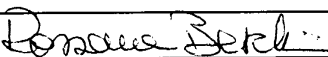 | Date: 24/4/20 |
| Name (17): Christin Susanna Börschel | Signature:                                                                                      | Date:         |
| Name (18): Simona Giampaoli          | Signature:                                                                                      | Date:         |
| Name (19): Augusto Di Castelnuovo    | Signature:                                                                                      | Date:         |
| Name (20): Christina Magnussen       | Signature:                                                                                      | Date:         |
| Name (21): Frank Kee                 | Signature:                                                                                      | Date:         |
| Name (22): Wolfgang Koenig           | Signature:                                                                                      | Date:         |
| Name (23): Stefan Blankenberg        | Signature:                                                                                      | Date:         |
| Name (24): Giovanni de Gaetano       | Signature:                                                                                      | Date:         |
| Name (25): Hugh Tunstall-Pedoe       | Signature:                                                                                      | Date:         |
| Name (26): Susanne Rospleszcz        | Signature:                                                                                      | Date:         |
| Name (27): Torben Jørgensen          | Signature:                                                                                      | Date:         |
| Name (28): Tanja Zeller              | Signature:                                                                                      | Date:         |
| Name (29): Kari Kuulasmaa            | Signature:                                                                                      | Date:         |
| Name (30): Allan Linneberg           | Signature:                                                                                      | Date:         |
| Name (31): Veikko Salomaa            | Signature:                                                                                      | Date:         |
| Name (32): Licia Iacoviello          | Signature:                                                                                      | Date:         |
| Name (33): Renate Schnabel           | Signature:                                                                                      | Date:         |

## Change of Authorship Form – Continued

**Manuscript Number:** STROKE/2020/029452

**Manuscript Title:** Cardiac Troponin I and Incident Stroke in European Cohorts - Insights from the BiomarCaRE Project

### Former Authorship

|                                      |                                |
|--------------------------------------|--------------------------------|
| Name (13): Maria Benedetta Donati    | Name (23): Giovanni de Gaetano |
| Name (14): Chiara Donfrancesco       | Name (24): Hugh Tunstall-Pedoe |
| Name (15): Rossana Borchini          | Name (25): Susanne Rospleszcz  |
| Name (16): Christin Susanna Börschel | Name (26): Torben Jørgensen    |
| Name (17): Simona Giampaoli          | Name (27): Tanja Zeller        |
| Name (18): Augusto Di Castelnuovo    | Name (28): Kari Kuulasmaa      |
| Name (19): Christina Magnussen       | Name (29): Allan Linneberg     |
| Name (20): Frank Kee                 | Name (30): Veikko Salomaa      |
| Name (21): Wolfgang Koenig           | Name (31): Licia Iacoviello    |
| Name (22): Stefan Blankenberg        | Name (32): Renate Schnabel     |

### New Authorship

|                                      |                                                                                                 |                  |
|--------------------------------------|-------------------------------------------------------------------------------------------------|------------------|
| Name (13): Erkki Vartiainen          | Signature:                                                                                      | Date:            |
| Name (14): Maria Benedetta Donati    | Signature:                                                                                      | Date:            |
| Name (15): Chiara Donfrancesco       | Signature:                                                                                      | Date:            |
| Name (16): Rossana Borchini          | Signature:                                                                                      | Date:            |
| Name (17): Christin Susanna Börschel | Signature:   | Date: 01.04.2020 |
| Name (18): Simona Giampaoli          | Signature:                                                                                      | Date:            |
| Name (19): Augusto Di Castelnuovo    | Signature:                                                                                      | Date:            |
| Name (20): Christina Magnussen       | Signature:                                                                                      | Date:            |
| Name (21): Frank Kee                 | Signature:                                                                                      | Date:            |
| Name (22): Wolfgang Koenig           | Signature:                                                                                      | Date:            |
| Name (23): Stefan Blankenberg        | Signature:                                                                                      | Date:            |
| Name (24): Giovanni de Gaetano       | Signature:                                                                                      | Date:            |
| Name (25): Hugh Tunstall-Pedoe       | Signature:                                                                                      | Date:            |
| Name (26): Susanne Rospleszcz        | Signature:                                                                                      | Date:            |
| Name (27): Torben Jørgensen          | Signature:                                                                                      | Date:            |
| Name (28): Tanja Zeller              | Signature:  | Date: 30.03.2020 |
| Name (29): Kari Kuulasmaa            | Signature:                                                                                      | Date:            |
| Name (30): Allan Linneberg           | Signature:                                                                                      | Date:            |
| Name (31): Veikko Salomaa            | Signature:                                                                                      | Date:            |
| Name (32): Licia Iacoviello          | Signature:                                                                                      | Date:            |
| Name (33): Renate Schnabel           | Signature:   | Date: 2.4.20     |

## Change of Authorship Form – Continued

**Manuscript Number:** STROKE/2020/029452

**Manuscript Title:** Cardiac Troponin I and Incident Stroke in European Cohorts - Insights from the BiomarCaRE Project

### Former Authorship

|                                      |                                |
|--------------------------------------|--------------------------------|
| Name (13): Maria Benedetta Donati    | Name (23): Giovanni de Gaetano |
| Name (14): Chiara Donfrancesco       | Name (24): Hugh Tunstall-Pedoe |
| Name (15): Rossana Borchini          | Name (25): Susanne Rospleszcz  |
| Name (16): Christin Susanna Börschel | Name (26): Torben Jørgensen    |
| Name (17): Simona Giampaoli          | Name (27): Tanja Zeller        |
| Name (18): Augusto Di Castelnuovo    | Name (28): Kari Kuulasmaa      |
| Name (19): Christina Magnussen       | Name (29): Allan Linneberg     |
| Name (20): Frank Kee                 | Name (30): Veikko Salomaa      |
| Name (21): Wolfgang Koenig           | Name (31): Licia Iacoviello    |
| Name (22): Stefan Blankenberg        | Name (32): Renate Schnabel     |

### New Authorship

|                                      |                                    |                 |
|--------------------------------------|------------------------------------|-----------------|
| Name (13): Erkki Vartiainen          | Signature:                         | Date:           |
| Name (14): Maria Benedetta Donati    | Signature:                         | Date:           |
| Name (15): Chiara Donfrancesco       | Signature:                         | Date:           |
| Name (16): Rossana Borchini          | Signature:                         | Date:           |
| Name (17): Christin Susanna Börschel | Signature:                         | Date:           |
| Name (18): Simona Giampaoli          | Signature: <i>Simona Giampaoli</i> | Date: 30/3/2020 |
| Name (19): Augusto Di Castelnuovo    | Signature:                         | Date:           |
| Name (20): Christina Magnussen       | Signature:                         | Date:           |
| Name (21): Frank Kee                 | Signature:                         | Date:           |
| Name (22): Wolfgang Koenig           | Signature:                         | Date:           |
| Name (23): Stefan Blankenberg        | Signature:                         | Date:           |
| Name (24): Giovanni de Gaetano       | Signature:                         | Date:           |
| Name (25): Hugh Tunstall-Pedoe       | Signature:                         | Date:           |
| Name (26): Susanne Rospleszcz        | Signature:                         | Date:           |
| Name (27): Torben Jørgensen          | Signature:                         | Date:           |
| Name (28): Tanja Zeller              | Signature:                         | Date:           |
| Name (29): Kari Kuulasmaa            | Signature:                         | Date:           |
| Name (30): Allan Linneberg           | Signature:                         | Date:           |
| Name (31): Veikko Salomaa            | Signature:                         | Date:           |
| Name (32): Licia Iacoviello          | Signature:                         | Date:           |
| Name (33): Renate Schnabel           | Signature:                         | Date:           |

## Change of Authorship Form – Continued

**Manuscript Number:** STROKE/2020/029452

**Manuscript Title:** Cardiac Troponin I and Incident Stroke in European Cohorts - Insights from the BiomarCaRE Project

### Former Authorship

|                                      |                                |
|--------------------------------------|--------------------------------|
| Name (13): Maria Benedetta Donati    | Name (23): Giovanni de Gaetano |
| Name (14): Chiara Donfrancesco       | Name (24): Hugh Tunstall-Pedoe |
| Name (15): Rossana Borchini          | Name (25): Susanne Rospleszcz  |
| Name (16): Christin Susanna Börschel | Name (26): Torben Jørgensen    |
| Name (17): Simona Giampaoli          | Name (27): Tanja Zeller        |
| Name (18): Augusto Di Castelnuovo    | Name (28): Kari Kuulasmaa      |
| Name (19): Christina Magnussen       | Name (29): Allan Linneberg     |
| Name (20): Frank Kee                 | Name (30): Veikko Salomaa      |
| Name (21): Wolfgang Koenig           | Name (31): Licia Iacoviello    |
| Name (22): Stefan Blankenberg        | Name (32): Renate Schnabel     |

### New Authorship

|                                      |                                                                                                 |                  |
|--------------------------------------|-------------------------------------------------------------------------------------------------|------------------|
| Name (13): Erkki Vartiainen          | Signature:                                                                                      | Date:            |
| Name (14): Maria Benedetta Donati    | Signature:                                                                                      | Date:            |
| Name (15): Chiara Donfrancesco       | Signature:                                                                                      | Date:            |
| Name (16): Rossana Borchini          | Signature:                                                                                      | Date:            |
| Name (17): Christin Susanna Börschel | Signature:                                                                                      | Date:            |
| Name (18): Simona Giampaoli          | Signature:                                                                                      | Date:            |
| Name (19): Augusto Di Castelnuovo    | Signature:  | Date: 04/18/2020 |
| Name (20): Christina Magnussen       | Signature:                                                                                      | Date:            |
| Name (21): Frank Kee                 | Signature:                                                                                      | Date:            |
| Name (22): Wolfgang Koenig           | Signature:                                                                                      | Date:            |
| Name (23): Stefan Blankenberg        | Signature:                                                                                      | Date:            |
| Name (24): Giovanni de Gaetano       | Signature:                                                                                      | Date:            |
| Name (25): Hugh Tunstall-Pedoe       | Signature:                                                                                      | Date:            |
| Name (26): Susanne Rospleszcz        | Signature:                                                                                      | Date:            |
| Name (27): Torben Jørgensen          | Signature:                                                                                      | Date:            |
| Name (28): Tanja Zeller              | Signature:                                                                                      | Date:            |
| Name (29): Kari Kuulasmaa            | Signature:                                                                                      | Date:            |
| Name (30): Allan Linneberg           | Signature:                                                                                      | Date:            |
| Name (31): Veikko Salomaa            | Signature:                                                                                      | Date:            |
| Name (32): Licia Iacoviello          | Signature:                                                                                      | Date:            |
| Name (33): Renate Schnabel           | Signature:                                                                                      | Date:            |



## Change of Authorship Form – Continued

**Manuscript Number:** STROKE/2020/029452

**Manuscript Title:** Cardiac Troponin I and Incident Stroke in European Cohorts - Insights from the BiomarCaRE Project

### Former Authorship

|                                      |                                |
|--------------------------------------|--------------------------------|
| Name (13): Maria Benedetta Donati    | Name (23): Giovanni de Gaetano |
| Name (14): Chiara Donfrancesco       | Name (24): Hugh Tunstall-Pedoe |
| Name (15): Rossana Borchini          | Name (25): Susanne Rospleszcz  |
| Name (16): Christin Susanna Börschel | Name (26): Torben Jørgensen    |
| Name (17): Simona Giampaoli          | Name (27): Tanja Zeller        |
| Name (18): Augusto Di Castelnuovo    | Name (28): Kari Kuulasmaa      |
| Name (19): Christina Magnussen       | Name (29): Allan Linneberg     |
| Name (20): Frank Kee                 | Name (30): Veikko Salomaa      |
| Name (21): Wolfgang Koenig           | Name (31): Licia Iacoviello    |
| Name (22): Stefan Blankenberg        | Name (32): Renate Schnabel     |

### New Authorship

|                                      |                                                                                                 |                  |
|--------------------------------------|-------------------------------------------------------------------------------------------------|------------------|
| Name (13): Erkki Vartiainen          | Signature:                                                                                      | Date:            |
| Name (14): Maria Benedetta Donati    | Signature:                                                                                      | Date:            |
| Name (15): Chiara Donfrancesco       | Signature:                                                                                      | Date:            |
| Name (16): Rossana Borchini          | Signature:                                                                                      | Date:            |
| Name (17): Christin Susanna Börschel | Signature:                                                                                      | Date:            |
| Name (18): Simona Giampaoli          | Signature:                                                                                      | Date:            |
| Name (19): Augusto Di Castelnuovo    | Signature:                                                                                      | Date:            |
| Name (20): Christina Magnussen       | Signature:  | Date: 30/03/2020 |
| Name (21): Frank Kee                 | Signature:                                                                                      | Date:            |
| Name (22): Wolfgang Koenig           | Signature:                                                                                      | Date:            |
| Name (23): Stefan Blankenberg        | Signature:                                                                                      | Date:            |
| Name (24): Giovanni de Gaetano       | Signature:                                                                                      | Date:            |
| Name (25): Hugh Tunstall-Pedoe       | Signature:                                                                                      | Date:            |
| Name (26): Susanne Rospleszcz        | Signature:                                                                                      | Date:            |
| Name (27): Torben Jørgensen          | Signature:                                                                                      | Date:            |
| Name (28): Tanja Zeller              | Signature:                                                                                      | Date:            |
| Name (29): Kari Kuulasmaa            | Signature:                                                                                      | Date:            |
| Name (30): Allan Linneberg           | Signature:                                                                                      | Date:            |
| Name (31): Veikko Salomaa            | Signature:                                                                                      | Date:            |
| Name (32): Licia Iacoviello          | Signature:                                                                                      | Date:            |
| Name (33): Renate Schnabel           | Signature:                                                                                      | Date:            |

## Change of Authorship Form – Continued

Manuscript Number: STROKE/2020/029452

Manuscript Title: Cardiac Troponin I and Incident Stroke in European Cohorts - Insights from the BiomarCaRE Project

### Former Authorship

|                                      |                                |
|--------------------------------------|--------------------------------|
| Name (13): Maria Benedetta Donati    | Name (23): Giovanni de Gaetano |
| Name (14): Chiara Donfrancesco       | Name (24): Hugh Tunstall-Pedoe |
| Name (15): Rossana Borchini          | Name (25): Susanne Rospleszcz  |
| Name (16): Christin Susanna Börschel | Name (26): Torben Jørgensen    |
| Name (17): Simona Giampaoli          | Name (27): Tanja Zeller        |
| Name (18): Augusto Di Castelnuovo    | Name (28): Kari Kuulasmaa      |
| Name (19): Christina Magnussen       | Name (29): Allan Linneberg     |
| Name (20): Frank Kee                 | Name (30): Veikko Salomaa      |
| Name (21): Wolfgang Koenig           | Name (31): Licia Iacoviello    |
| Name (22): Stefan Blankenberg        | Name (32): Renate Schnabel     |

### New Authorship

|                                      |                         |               |
|--------------------------------------|-------------------------|---------------|
| Name (13): Erkki Vartiainen          | Signature:              | Date:         |
| Name (14): Maria Benedetta Donati    | Signature:              | Date:         |
| Name (15): Chiara Donfrancesco       | Signature:              | Date:         |
| Name (16): Rossana Borchini          | Signature:              | Date:         |
| Name (17): Christin Susanna Börschel | Signature:              | Date:         |
| Name (18): Simona Giampaoli          | Signature:              | Date:         |
| Name (19): Augusto Di Castelnuovo    | Signature:              | Date:         |
| Name (20): Christina Magnussen       | Signature:              | Date:         |
| Name (21): Frank Kee                 | Signature: <i>F Kee</i> | Date: 30/3/20 |
| Name (22): Wolfgang Koenig           | Signature:              | Date:         |
| Name (23): Stefan Blankenberg        | Signature:              | Date:         |
| Name (24): Giovanni de Gaetano       | Signature:              | Date:         |
| Name (25): Hugh Tunstall-Pedoe       | Signature:              | Date:         |
| Name (26): Susanne Rospleszcz        | Signature:              | Date:         |
| Name (27): Torben Jørgensen          | Signature:              | Date:         |
| Name (28): Tanja Zeller              | Signature:              | Date:         |
| Name (29): Kari Kuulasmaa            | Signature:              | Date:         |
| Name (30): Allan Linneberg           | Signature:              | Date:         |
| Name (31): Veikko Salomaa            | Signature:              | Date:         |
| Name (32): Licia Iacoviello          | Signature:              | Date:         |
| Name (33): Renate Schnabel           | Signature:              | Date:         |

## Change of Authorship Form – Continued

Manuscript Number: STROKE/2020/029452

Manuscript Title: Cardiac Troponin I and Incident Stroke in European Cohorts - Insights from the BiomarCaRE Project

### Former Authorship

|                                      |                                |
|--------------------------------------|--------------------------------|
| Name (13): Maria Benedetta Donati    | Name (23): Giovanni de Gaetano |
| Name (14): Chiara Donfrancesco       | Name (24): Hugh Tunstall-Pedoe |
| Name (15): Rossana Borchini          | Name (25): Susanne Rospleszcz  |
| Name (16): Christin Susanna Börschel | Name (26): Torben Jørgensen    |
| Name (17): Simona Giampaoli          | Name (27): Tanja Zeller        |
| Name (18): Augusto Di Castelnuovo    | Name (28): Kari Kuulasmaa      |
| Name (19): Christina Magnussen       | Name (29): Allan Linneberg     |
| Name (20): Frank Kee                 | Name (30): Veikko Salomaa      |
| Name (21): Wolfgang Koenig           | Name (31): Licia Iacoviello    |
| Name (22): Stefan Blankenberg        | Name (32): Renate Schnabel     |

### New Authorship

|                                      |                                                                                                 |                  |
|--------------------------------------|-------------------------------------------------------------------------------------------------|------------------|
| Name (13): Erkki Vartiainen          | Signature:                                                                                      | Date:            |
| Name (14): Maria Benedetta Donati    | Signature:                                                                                      | Date:            |
| Name (15): Chiara Donfrancesco       | Signature:                                                                                      | Date:            |
| Name (16): Rossana Borchini          | Signature:                                                                                      | Date:            |
| Name (17): Christin Susanna Börschel | Signature:                                                                                      | Date:            |
| Name (18): Simona Giampaoli          | Signature:                                                                                      | Date:            |
| Name (19): Augusto Di Castelnuovo    | Signature:                                                                                      | Date:            |
| Name (20): Christina Magnussen       | Signature:                                                                                      | Date:            |
| Name (21): Frank Kee                 | Signature:                                                                                      | Date:            |
| Name (22): Wolfgang Koenig           | Signature:  | Date: 30.03.2020 |
| Name (23): Stefan Blankenberg        | Signature:                                                                                      | Date:            |
| Name (24): Giovanni de Gaetano       | Signature:                                                                                      | Date:            |
| Name (25): Hugh Tunstall-Pedoe       | Signature:                                                                                      | Date:            |
| Name (26): Susanne Rospleszcz        | Signature:                                                                                      | Date:            |
| Name (27): Torben Jørgensen          | Signature:                                                                                      | Date:            |
| Name (28): Tanja Zeller              | Signature:                                                                                      | Date:            |
| Name (29): Kari Kuulasmaa            | Signature:                                                                                      | Date:            |
| Name (30): Allan Linneberg           | Signature:                                                                                      | Date:            |
| Name (31): Veikko Salomaa            | Signature:                                                                                      | Date:            |
| Name (32): Licia Iacoviello          | Signature:                                                                                      | Date:            |
| Name (33): Renate Schnabel           | Signature:                                                                                      | Date:            |

## Change of Authorship Form – Continued

**Manuscript Number:** STROKE/2020/029452

**Manuscript Title:** Cardiac Troponin I and Incident Stroke in European Cohorts - Insights from the BiomarCaRE Project

### Former Authorship

|                                      |                                |
|--------------------------------------|--------------------------------|
| Name (13): Maria Benedetta Donati    | Name (23): Giovanni de Gaetano |
| Name (14): Chiara Donfrancesco       | Name (24): Hugh Tunstall-Pedoe |
| Name (15): Rossana Borchini          | Name (25): Susanne Rospleszcz  |
| Name (16): Christin Susanna Börschel | Name (26): Torben Jørgensen    |
| Name (17): Simona Giampaoli          | Name (27): Tanja Zeller        |
| Name (18): Augusto Di Castelnuovo    | Name (28): Kari Kuulasmaa      |
| Name (19): Christina Magnussen       | Name (29): Allan Linneberg     |
| Name (20): Frank Kee                 | Name (30): Veikko Salomaa      |
| Name (21): Wolfgang Koenig           | Name (31): Licia Iacoviello    |
| Name (22): Stefan Blankenberg        | Name (32): Renate Schnabel     |

### New Authorship

|                                      |                                                                                                 |                |
|--------------------------------------|-------------------------------------------------------------------------------------------------|----------------|
| Name (13): Erkki Vartiainen          | Signature:                                                                                      | Date:          |
| Name (14): Maria Benedetta Donati    | Signature:                                                                                      | Date:          |
| Name (15): Chiara Donfrancesco       | Signature:                                                                                      | Date:          |
| Name (16): Rossana Borchini          | Signature:                                                                                      | Date:          |
| Name (17): Christin Susanna Börschel | Signature:                                                                                      | Date:          |
| Name (18): Simona Giampaoli          | Signature:                                                                                      | Date:          |
| Name (19): Augusto Di Castelnuovo    | Signature:                                                                                      | Date:          |
| Name (20): Christina Magnussen       | Signature:                                                                                      | Date:          |
| Name (21): Frank Kee                 | Signature:                                                                                      | Date:          |
| Name (22): Wolfgang Koenig           | Signature:                                                                                      | Date:          |
| Name (23): Stefan Blankenberg        | Signature: 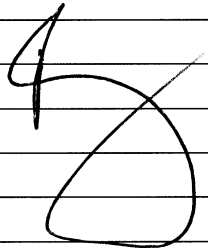 | Date: 30/03/20 |
| Name (24): Giovanni de Gaetano       | Signature:                                                                                      | Date:          |
| Name (25): Hugh Tunstall-Pedoe       | Signature:                                                                                      | Date:          |
| Name (26): Susanne Rospleszcz        | Signature:                                                                                      | Date:          |
| Name (27): Torben Jørgensen          | Signature:                                                                                      | Date:          |
| Name (28): Tanja Zeller              | Signature:                                                                                      | Date:          |
| Name (29): Kari Kuulasmaa            | Signature:                                                                                      | Date:          |
| Name (30): Allan Linneberg           | Signature:                                                                                      | Date:          |
| Name (31): Veikko Salomaa            | Signature:                                                                                      | Date:          |
| Name (32): Licia Iacoviello          | Signature:                                                                                      | Date:          |
| Name (33): Renate Schnabel           | Signature:                                                                                      | Date:          |

## Change of Authorship Form – Continued

Manuscript Number: STROKE/2020/029452

Manuscript Title: Cardiac Troponin I and Incident Stroke in European Cohorts - Insights from the BiomarcARE Project

### Former Authorship

|                                      |                                |
|--------------------------------------|--------------------------------|
| Name (13): Maria Benedetta Donati    | Name (23): Giovanni de Gaetano |
| Name (14): Chiara Donfrancesco       | Name (24): Hugh Tunstall-Pedoe |
| Name (15): Rossana Borchini          | Name (25): Susanne Rospleszcz  |
| Name (16): Christin Susanna Börschel | Name (26): Torben Jørgensen    |
| Name (17): Simona Giampaoli          | Name (27): Tanja Zeller        |
| Name (18): Augusto Di Castelnuovo    | Name (28): Kari Kuulasmaa      |
| Name (19): Christina Magnussen       | Name (29): Allan Linneberg     |
| Name (20): Frank Kee                 | Name (30): Veikko Salomaa      |
| Name (21): Wolfgang Koenig           | Name (31): Licia Iacoviello    |
| Name (22): Stefan Blankenberg        | Name (32): Renate Schnabel     |

### New Authorship

|                                      |                                       |                 |
|--------------------------------------|---------------------------------------|-----------------|
| Name (13): Erkki Vartiainen          | Signature:                            | Date:           |
| Name (14): Maria Benedetta Donati    | Signature:                            | Date:           |
| Name (15): Chiara Donfrancesco       | Signature:                            | Date:           |
| Name (16): Rossana Borchini          | Signature:                            | Date:           |
| Name (17): Christin Susanna Börschel | Signature:                            | Date:           |
| Name (18): Simona Giampaoli          | Signature:                            | Date:           |
| Name (19): Augusto Di Castelnuovo    | Signature:                            | Date:           |
| Name (20): Christina Magnussen       | Signature:                            | Date:           |
| Name (21): Frank Kee                 | Signature:                            | Date:           |
| Name (22): Wolfgang Koenig           | Signature:                            | Date:           |
| Name (23): Stefan Blankenberg        | Signature:                            | Date:           |
| Name (24): Giovanni de Gaetano       | Signature:                            | Date:           |
| Name (25): Hugh Tunstall-Pedoe       | Signature: <i>Hugh Tunstall-Pedoe</i> | Date: 27/4/2020 |
| Name (26): Susanne Rospleszcz        | Signature:                            | Date:           |
| Name (27): Torben Jørgensen          | Signature:                            | Date:           |
| Name (28): Tanja Zeller              | Signature:                            | Date:           |
| Name (29): Kari Kuulasmaa            | Signature:                            | Date:           |
| Name (30): Allan Linneberg           | Signature:                            | Date:           |
| Name (31): Veikko Salomaa            | Signature:                            | Date:           |
| Name (32): Licia Iacoviello          | Signature:                            | Date:           |
| Name (33): Renate Schnabel           | Signature:                            | Date:           |

## Change of Authorship Form – Continued

**Manuscript Number:** STROKE/2020/029452

**Manuscript Title:** Cardiac Troponin I and Incident Stroke in European Cohorts - Insights from the BiomarCaRE Project

### Former Authorship

|                                      |                                |
|--------------------------------------|--------------------------------|
| Name (13): Maria Benedetta Donati    | Name (23): Giovanni de Gaetano |
| Name (14): Chiara Donfrancesco       | Name (24): Hugh Tunstall-Pedoe |
| Name (15): Rossana Borchini          | Name (25): Susanne Rospleszcz  |
| Name (16): Christin Susanna Börschel | Name (26): Torben Jørgensen    |
| Name (17): Simona Giampaoli          | Name (27): Tanja Zeller        |
| Name (18): Augusto Di Castelnuovo    | Name (28): Kari Kuulasmaa      |
| Name (19): Christina Magnussen       | Name (29): Allan Linneberg     |
| Name (20): Frank Kee                 | Name (30): Veikko Salomaa      |
| Name (21): Wolfgang Koenig           | Name (31): Licia Iacoviello    |
| Name (22): Stefan Blankenberg        | Name (32): Renate Schnabel     |

### New Authorship

|                                      |                                                                                                 |                   |
|--------------------------------------|-------------------------------------------------------------------------------------------------|-------------------|
| Name (13): Erkki Vartiainen          | Signature:                                                                                      | Date:             |
| Name (14): Maria Benedetta Donati    | Signature:                                                                                      | Date:             |
| Name (15): Chiara Donfrancesco       | Signature:                                                                                      | Date:             |
| Name (16): Rossana Borchini          | Signature:                                                                                      | Date:             |
| Name (17): Christin Susanna Börschel | Signature:                                                                                      | Date:             |
| Name (18): Simona Giampaoli          | Signature:                                                                                      | Date:             |
| Name (19): Augusto Di Castelnuovo    | Signature:                                                                                      | Date:             |
| Name (20): Christina Magnussen       | Signature:                                                                                      | Date:             |
| Name (21): Frank Kee                 | Signature:                                                                                      | Date:             |
| Name (22): Wolfgang Koenig           | Signature:                                                                                      | Date:             |
| Name (23): Stefan Blankenberg        | Signature:                                                                                      | Date:             |
| Name (24): Giovanni de Gaetano       | Signature:                                                                                      | Date:             |
| Name (25): Hugh Tunstall-Pedoe       | Signature:                                                                                      | Date:             |
| Name (26): Susanne Rospleszcz        | Signature:  | Date: 30/Mar/2020 |
| Name (27): Torben Jørgensen          | Signature:                                                                                      | Date:             |
| Name (28): Tanja Zeller              | Signature:                                                                                      | Date:             |
| Name (29): Kari Kuulasmaa            | Signature:                                                                                      | Date:             |
| Name (30): Allan Linneberg           | Signature:                                                                                      | Date:             |
| Name (31): Veikko Salomaa            | Signature:                                                                                      | Date:             |
| Name (32): Licia Iacoviello          | Signature:                                                                                      | Date:             |
| Name (33): Renate Schnabel           | Signature:                                                                                      | Date:             |



## Change of Authorship Form – Continued

**Manuscript Number:** STROKE/2020/029452

**Manuscript Title:** Cardiac Troponin I and Incident Stroke in European Cohorts - Insights from the BiomarCaRE Project

### Former Authorship

|                                      |                                |
|--------------------------------------|--------------------------------|
| Name (13): Maria Benedetta Donati    | Name (23): Giovanni de Gaetano |
| Name (14): Chiara Donfrancesco       | Name (24): Hugh Tunstall-Pedoe |
| Name (15): Rossana Borchini          | Name (25): Susanne Rospleszcz  |
| Name (16): Christin Susanna Börschel | Name (26): Torben Jørgensen    |
| Name (17): Simona Giampaoli          | Name (27): Tanja Zeller        |
| Name (18): Augusto Di Castelnuovo    | Name (28): Kari Kuulasmaa      |
| Name (19): Christina Magnussen       | Name (29): Allan Linneberg     |
| Name (20): Frank Kee                 | Name (30): Veikko Salomaa      |
| Name (21): Wolfgang Koenig           | Name (31): Licia Iacoviello    |
| Name (22): Stefan Blankenberg        | Name (32): Renate Schnabel     |

### New Authorship

|                                      |                                                                                                 |                 |
|--------------------------------------|-------------------------------------------------------------------------------------------------|-----------------|
| Name (13): Erkki Vartiainen          | Signature:                                                                                      | Date:           |
| Name (14): Maria Benedetta Donati    | Signature:                                                                                      | Date:           |
| Name (15): Chiara Donfrancesco       | Signature:                                                                                      | Date:           |
| Name (16): Rossana Borchini          | Signature:                                                                                      | Date:           |
| Name (17): Christin Susanna Börschel | Signature:                                                                                      | Date:           |
| Name (18): Simona Giampaoli          | Signature:                                                                                      | Date:           |
| Name (19): Augusto Di Castelnuovo    | Signature:                                                                                      | Date:           |
| Name (20): Christina Magnussen       | Signature:                                                                                      | Date:           |
| Name (21): Frank Kee                 | Signature:                                                                                      | Date:           |
| Name (22): Wolfgang Koenig           | Signature:                                                                                      | Date:           |
| Name (23): Stefan Blankenberg        | Signature:                                                                                      | Date:           |
| Name (24): Giovanni de Gaetano       | Signature:                                                                                      | Date:           |
| Name (25): Hugh Tunstall-Pedoe       | Signature:                                                                                      | Date:           |
| Name (26): Susanne Rospleszcz        | Signature:                                                                                      | Date:           |
| Name (27): Torben Jørgensen          | Signature:  | Date: 31/3 2020 |
| Name (28): Tanja Zeller              | Signature:                                                                                      | Date:           |
| Name (29): Kari Kuulasmaa            | Signature:                                                                                      | Date:           |
| Name (30): Allan Linneberg           | Signature:                                                                                      | Date:           |
| Name (31): Veikko Salomaa            | Signature:                                                                                      | Date:           |
| Name (32): Licia Iacoviello          | Signature:                                                                                      | Date:           |
| Name (33): Renate Schnabel           | Signature:                                                                                      | Date:           |

## Change of Authorship Form – Continued

**Manuscript Number:** STROKE/2020/029452

**Manuscript Title:** Cardiac Troponin I and Incident Stroke in European Cohorts - Insights from the BiomarCaRE Project

### Former Authorship

|                                      |                                |
|--------------------------------------|--------------------------------|
| Name (13): Maria Benedetta Donati    | Name (23): Giovanni de Gaetano |
| Name (14): Chiara Donfrancesco       | Name (24): Hugh Tunstall-Pedoe |
| Name (15): Rossana Borchini          | Name (25): Susanne Rospleszcz  |
| Name (16): Christin Susanna Börschel | Name (26): Torben Jørgensen    |
| Name (17): Simona Giampaoli          | Name (27): Tanja Zeller        |
| Name (18): Augusto Di Castelnuovo    | Name (28): Kari Kuulasmaa      |
| Name (19): Christina Magnussen       | Name (29): Allan Linneberg     |
| Name (20): Frank Kee                 | Name (30): Veikko Salomaa      |
| Name (21): Wolfgang Koenig           | Name (31): Licia Iacoviello    |
| Name (22): Stefan Blankenberg        | Name (32): Renate Schnabel     |

### New Authorship

|                                      |                                                                                                 |                  |
|--------------------------------------|-------------------------------------------------------------------------------------------------|------------------|
| Name (13): Erkki Vartiainen          | Signature:                                                                                      | Date:            |
| Name (14): Maria Benedetta Donati    | Signature:                                                                                      | Date:            |
| Name (15): Chiara Donfrancesco       | Signature:                                                                                      | Date:            |
| Name (16): Rossana Borchini          | Signature:                                                                                      | Date:            |
| Name (17): Christin Susanna Börschel | Signature:                                                                                      | Date:            |
| Name (18): Simona Giampaoli          | Signature:                                                                                      | Date:            |
| Name (19): Augusto Di Castelnuovo    | Signature:                                                                                      | Date:            |
| Name (20): Christina Magnussen       | Signature:                                                                                      | Date:            |
| Name (21): Frank Kee                 | Signature:                                                                                      | Date:            |
| Name (22): Wolfgang Koenig           | Signature:                                                                                      | Date:            |
| Name (23): Stefan Blankenberg        | Signature:                                                                                      | Date:            |
| Name (24): Giovanni de Gaetano       | Signature:                                                                                      | Date:            |
| Name (25): Hugh Tunstall-Pedoe       | Signature:                                                                                      | Date:            |
| Name (26): Susanne Rospleszcz        | Signature:                                                                                      | Date:            |
| Name (27): Torben Jørgensen          | Signature:                                                                                      | Date:            |
| Name (28): Tanja Zeller              | Signature:                                                                                      | Date:            |
| Name (29): Kari Kuulasmaa            | Signature:  | Date: 03/30/2020 |
| Name (30): Allan Linneberg           | Signature:                                                                                      | Date:            |
| Name (31): Veikko Salomaa            | Signature:  | Date: 03/30/2020 |
| Name (32): Licia Iacoviello          | Signature:                                                                                      | Date:            |
| Name (33): Renate Schnabel           | Signature:                                                                                      | Date:            |

## Change of Authorship Form – Continued

**Manuscript Number:** STROKE/2020/029452

**Manuscript Title:** Cardiac Troponin I and Incident Stroke in European Cohorts - Insights from the BiomarcCaRE Project

### Former Authorship

|                                      |                                |
|--------------------------------------|--------------------------------|
| Name (13): Maria Benedetta Donati    | Name (23): Giovanni de Gaetano |
| Name (14): Chiara Donfrancesco       | Name (24): Hugh Tunstall-Pedoe |
| Name (15): Rossana Borchini          | Name (25): Susanne Rospleszcz  |
| Name (16): Christin Susanna Börschel | Name (26): Torben Jørgensen    |
| Name (17): Simona Giampaoli          | Name (27): Tanja Zeller        |
| Name (18): Augusto Di Castelnuovo    | Name (28): Kari Kuulasmaa      |
| Name (19): Christina Magnussen       | Name (29): Allan Linneberg     |
| Name (20): Frank Kee                 | Name (30): Veikko Salomaa      |
| Name (21): Wolfgang Koenig           | Name (31): Licia Iacoviello    |
| Name (22): Stefan Blankenberg        | Name (32): Renate Schnabel     |

### New Authorship

|                                      |                                                                                                 |               |
|--------------------------------------|-------------------------------------------------------------------------------------------------|---------------|
| Name (13): Erkki Vartiainen          | Signature:                                                                                      | Date:         |
| Name (14): Maria Benedetta Donati    | Signature:                                                                                      | Date:         |
| Name (15): Chiara Donfrancesco       | Signature:                                                                                      | Date:         |
| Name (16): Rossana Borchini          | Signature:                                                                                      | Date:         |
| Name (17): Christin Susanna Börschel | Signature:                                                                                      | Date:         |
| Name (18): Simona Giampaoli          | Signature:                                                                                      | Date:         |
| Name (19): Augusto Di Castelnuovo    | Signature:                                                                                      | Date:         |
| Name (20): Christina Magnussen       | Signature:                                                                                      | Date:         |
| Name (21): Frank Kee                 | Signature:                                                                                      | Date:         |
| Name (22): Wolfgang Koenig           | Signature:                                                                                      | Date:         |
| Name (23): Stefan Blankenberg        | Signature:                                                                                      | Date:         |
| Name (24): Giovanni de Gaetano       | Signature:                                                                                      | Date:         |
| Name (25): Hugh Tunstall-Pedoe       | Signature:                                                                                      | Date:         |
| Name (26): Susanne Rospleszcz        | Signature:                                                                                      | Date:         |
| Name (27): Torben Jørgensen          | Signature:                                                                                      | Date:         |
| Name (28): Tanja Zeller              | Signature:                                                                                      | Date:         |
| Name (29): Kari Kuulasmaa            | Signature:                                                                                      | Date:         |
| Name (30): Allan Linneberg           | Signature:  | Date: 30/3-20 |
| Name (31): Veikko Salomaa            | Signature:                                                                                      | Date:         |
| Name (32): Licia Iacoviello          | Signature:                                                                                      | Date:         |
| Name (33): Renate Schnabel           | Signature:                                                                                      | Date:         |
